# Supplementary material for: Cryo-Focused Ion Beam-Induced Deposition of Tungsten–Carbon Nanostructures Using a Thermoelectric Plate
Source: MDPI journal article supplement (doi:10.3390/app112110123), 2021-10-28
Supplement: s1 [file s1]

Archive with 1 entries (1 files):
- applsci-1423199-supplementary.pdf
